# Supplementary material
Source: HighWire-hosted journal article supplement (doi:10.1101/rna.079649.123)
Supplement: Supplemental_Table_S1.xlsx [file Supplemental_Table_S1.xlsx]

## Sheet: Table S1
Table S1. List of used primers and their sequences
Primer	Sequence
28S Forward	CTAAATACCGGCACGAGACC
28S Reverse	TTCACGCCCTCTTGAACTCT
5S Forward	GGCCATACCACCCTGAAC
5S Reverse	GGTCTCCCATCCAAGTACTAAC
7SK Forward	TCGGTCAAGGGTATACGAGTAG
7SK Reverse	TTTGGATGTGTCTGGAGTCTTG
7SL Forward	GCACTAAGTTCGGCATCAATATG
7SL Reverse	CTGATCAGCACGGGAGTTT
BC200 Forward	ATAGCTTGAGCCCAGGAGTT
BC200 Reverse	GCTTTGAGGGAAGTTACGCTTAT
Chr11 Centromere Forward	CTTCCTTCGAAACGGGTATATCT
Chr11 Centromere Reverse	GCTCCATCAGCAGGATTGT
hTERC Forward	GCGAAGAGTTGGGCTCTG
hTERC Reverse	ACTCGCTCCGTTCCTCTT
SRP9 Forward	CAGATGATTTAGTTTGTTTGGTGTATAAAA
SRP9 Reverse	TGGCTACCATAAGTCGCATTAG
Telomere C	TGTTAGGTATCC CTATCCCTATCCCTATCCCTATCCCTAACA
Telomere G	ACACTAAGGTTTGGGTTTGGGTTTGGGTTTGGGTTAGTGT
TP53 Forward	AGGGATGTTTGGGAGATGTAAG
TP53 Reverse	CCTGGTTAGTACGGTGAAGTG
tRNASer(GCT) Forward	GGTGGCCGAGTGGTTAAG
tRNASer(GCT) Reverse	CGACGAGGATGGTTAAG
